# Supplementary material for: Nucleoside Diphosphate Kinase B Contributes to Arrhythmogenesis in Human-Induced Pluripotent Stem Cell-Derived Cardiomyocytes from a Patient with Arrhythmogenic Right Ventricular Cardiomyopathy
Source: MDPI journal article supplement (doi:10.3390/jcm9020486), 2020-02-10
Supplement: s1 [file s1]

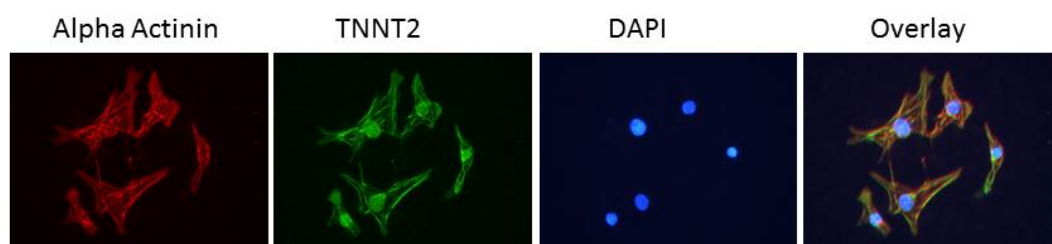

**Supplementary Figure S1: Expression of cardiac markers in ARVC-hiPSC-CMs.** Shown are representative images of immunohistochemical proof showing successful differentiation of cardiomyocytes by the expression of cardiac markers alpha-actinin (red) and troponin T (TNNT2, green) in ARVC-hiPSC-CMs. Cell nuclei were stained by DAPI.

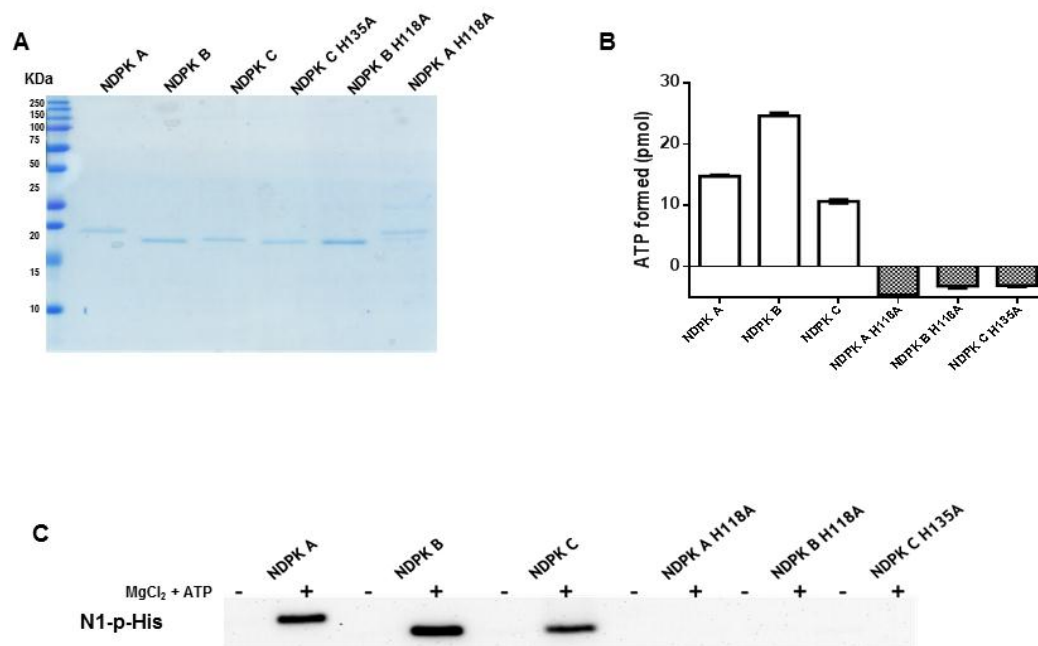

**Supplementary Figure S2. Assessment of the enzymatic activities of recombinantly expressed NDPK isoforms compared to catalytically inactive point mutants.** A. 50 ng of purified His<sub>6</sub>- tagged NDPK A, B or C or there inactive mutants were separated by 15% SDS-PAGE and visualized with coomassie brilliant blue R-250. B. The NTP/NDP transphosphorylase activity of 90 pM of the indicated recombinant NDPKs was quantified by the ATP formation from 10  $\mu$ M ADP and 100  $\mu$ M GTP as substrates. Mean  $\pm$  SEM from four assay replicates are shown. C. Representative western blot showing the autophosphorylation of NDPKs on their catalytic histidine residue: 100 ng of NDPKs were incubated with and without 1 mM Mg<sup>2+</sup>-ATP, separated by 15% SDS PAGE, and transferred onto a nitrocellulose membrane. The blot was probed with a N1-phospo-histidine antibody specifically recognizing the histidine residues phosphorylated at the N1 position.
